# Supplementary material for: The headspace solid-phase microextraction of polycyclic aromatic hydrocarbons in environmental water samples using silica fiber modified by self assembled gold nanoparticles
Source: Royal Society of Chemistry journal article supplement (doi:10.1039/c5ay01957e), 2015-01-01

Electronic Supporting Information

**The headspace solid-phase microextraction of polycyclic aromatic hydrocarbons in environmental water samples using modified silica fiber by self assembled gold nanoparticles**

Fahimeh Zare<sup>1</sup>, Mehrorang Ghaedi<sup>1,\*</sup>, Ali Daneshfar<sup>2</sup>

*1 Department of chemistry, Faculty of sciences, Yasouj University, Yasouj 75918-74831, Iran.*

*2 Department of chemistry, Faculty of sciences, Ilam University, Ilam 69315-516, Iran.*

*\*Corresponding author: Tel./Fax: + 98 743 222 3048.*

*E-mail: m\_ghaedi@yahoo.com*

**Table of contents in Supporting Information:**

Fig. S1. All reaction steps for the preparation of fiber.

Fig. S2. Effect of eluent on extraction efficiency of PAHs.

Fig. S3. Comparison of three kind of fibers; (fiber I): by application of gold nanoparticles, (fiber II): by application of palladium nanoparticles, (fiber III): by application of silver nanoparticles.

**Fig.S1.**

**1) Self-assembled monolayer reaction of gold nanoparticles with 3-TMSPT**

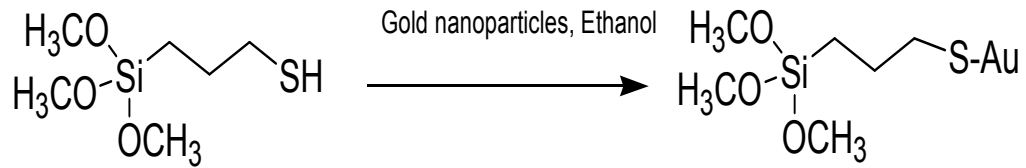

**2) Catalysis of 3-TMSPT-Au**

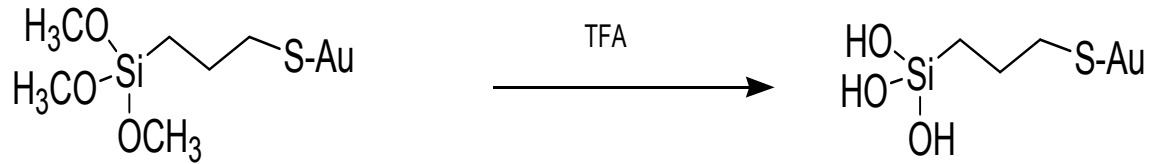

**3) Hydrolysis of alkoxy silane precursor- MTMOS**

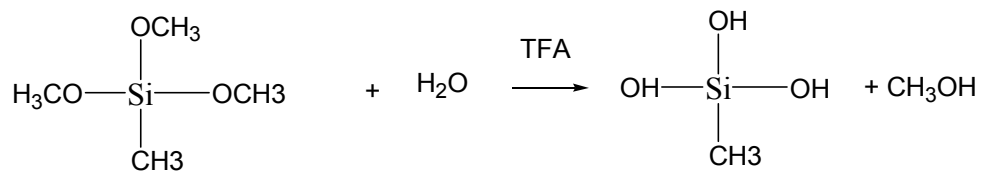

**4) Polycondensation of MTMOS**

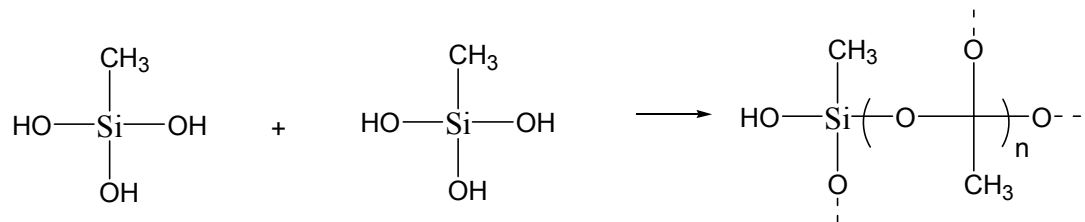

**5) Polycondensation of MTMOS with PEG**

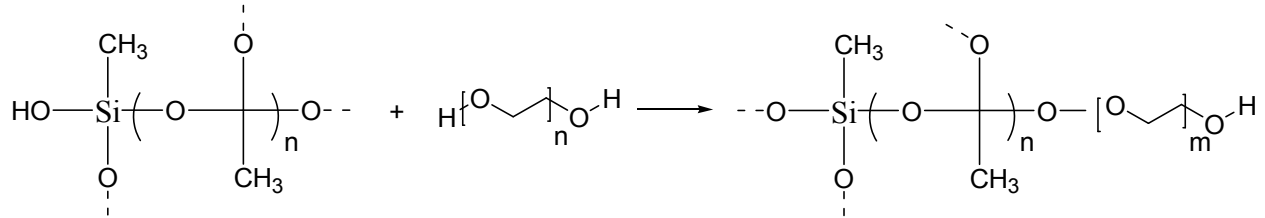

**6) Polycondensation the product of previous step with hydrolyzed 3-TMSPT-Au**

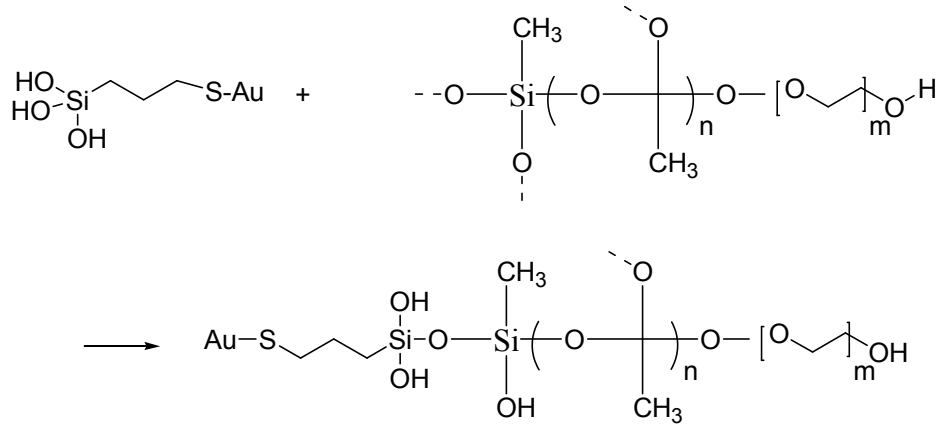

**7) Chemical bonding the formed sol-gel silica substrate to the outer surface of the fused-silica fiber**

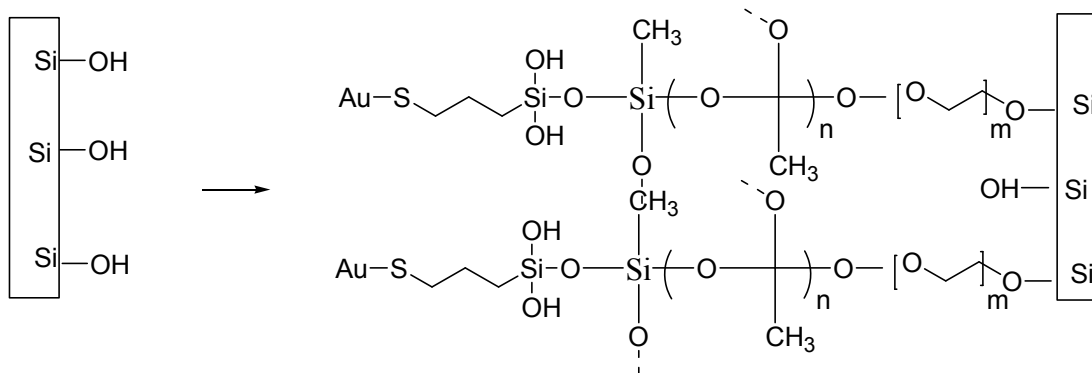

**Fig. S2.**

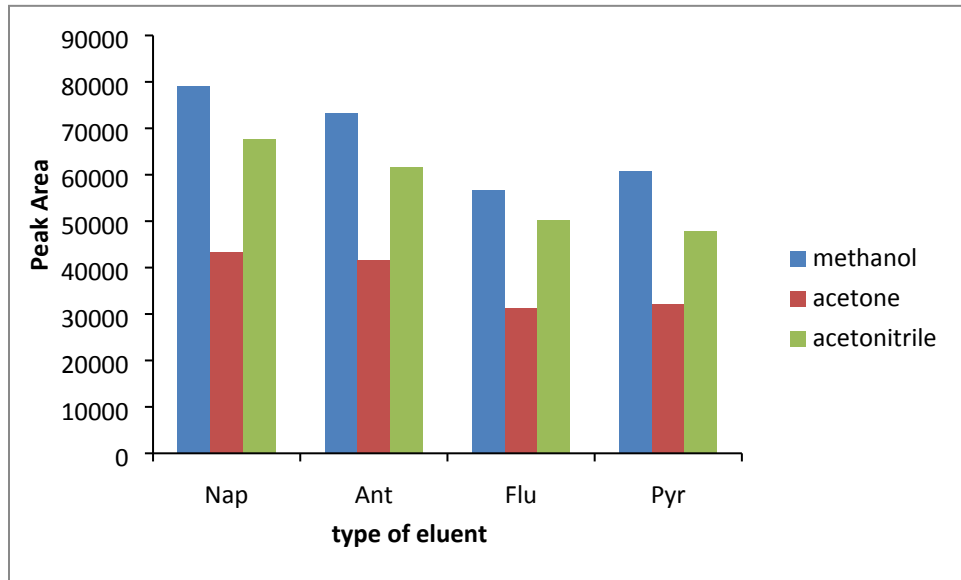

**Fig. S3.**

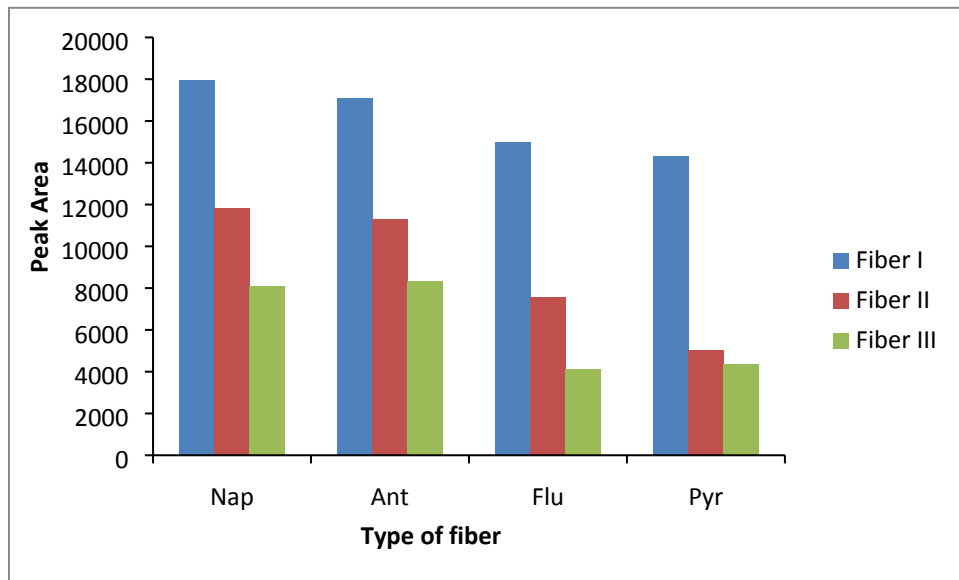

Supplement: c5ay01957e1.pdf [file c5ay01957e1.pdf]
